# Supplementary material for: Gene expression in murine mammary epithelial stem cell-like cells shows similarities to human breast cancer gene expression
Source: Springer Nature journal article supplement (doi:10.1186/bcr2256), 2009-05-08

**Supplementary Figure 1A.** Confirmatory real-time PCR analysis of genes down-regulated (left panel) or up-regulated (right panel), during differentiation of HC11 cells. Ranking of the likelihood of differential expression in the microarray analysis below. Average of three cell cultures and differentiations.

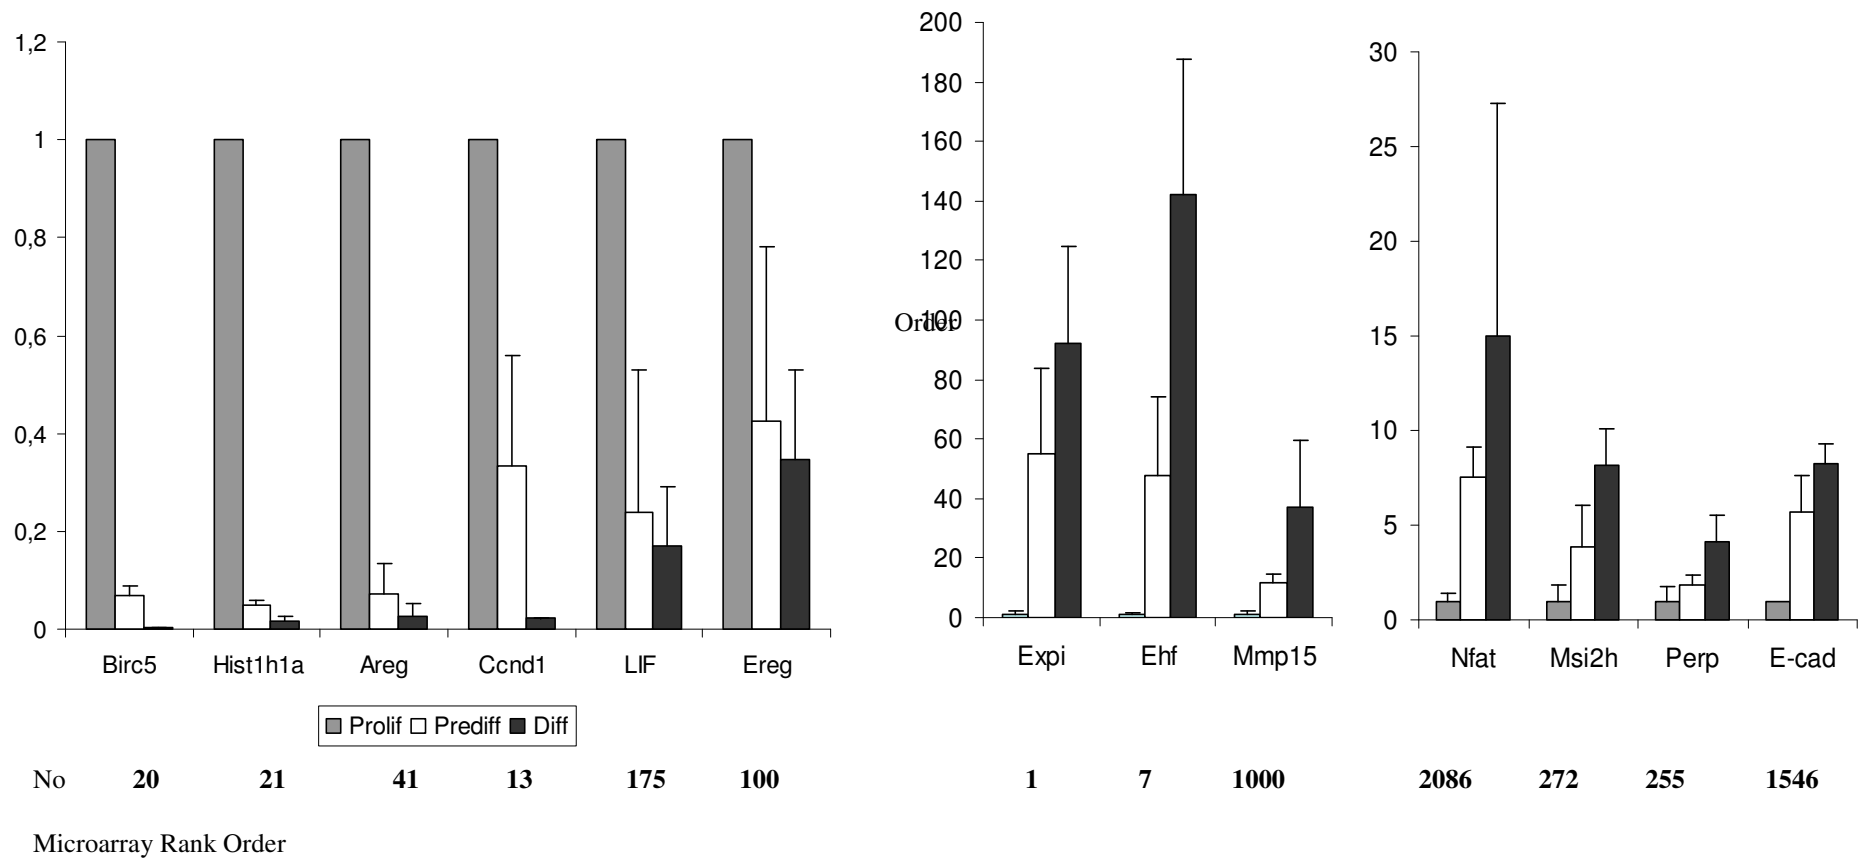

Supplement: Additional file 2 [file bcr2256-s2.pdf]
