# Supplementary material for: Gene expression in murine mammary epithelial stem cell-like cells shows similarities to human breast cancer gene expression
Source: Springer Nature journal article supplement (doi:10.1186/bcr2256), 2009-05-08

**Supplementary Figure 1B.** Correlating changes in *in vivo* mammary glands, of genes up-regulated (upper panel) or down-regulated (lower panel), respectively, during differentiation of HC11 cells. Average of 3-5 mice in each stage.

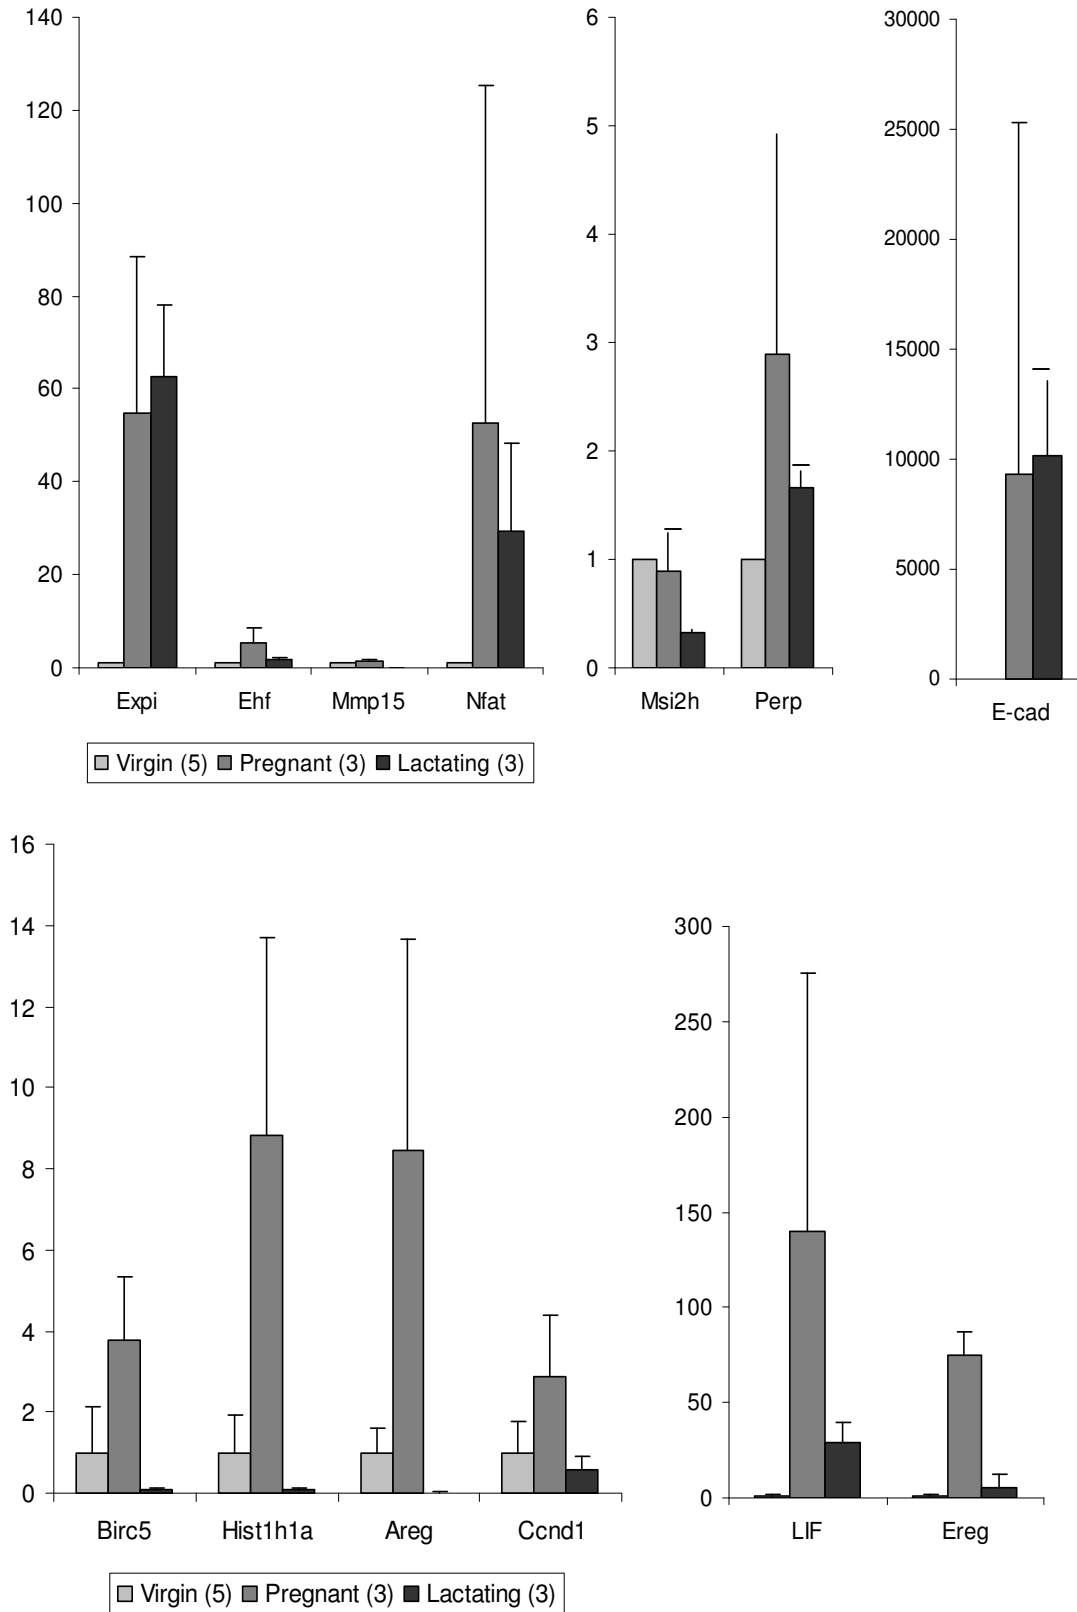

Supplement: Additional file 3 [file bcr2256-s3.pdf]
