# Supplementary material for: Gene expression in murine mammary epithelial stem cell-like cells shows similarities to human breast cancer gene expression
Source: Springer Nature journal article supplement (doi:10.1186/bcr2256), 2009-05-08

**Supplementary Figure 1D.** Expression of nuclear receptors and/or related genes decreasing during HC11 differentiation (upper panel) and correlating changes in *in vivo* mammary glands (lower panel), respectively. Average of three independent cell cultures and differentiations; or 3-5 mice in each stage, respectively. NR4a2 (NURR1), Nr4a1(NGFIB), Nr2f2 (COUP-TFII).

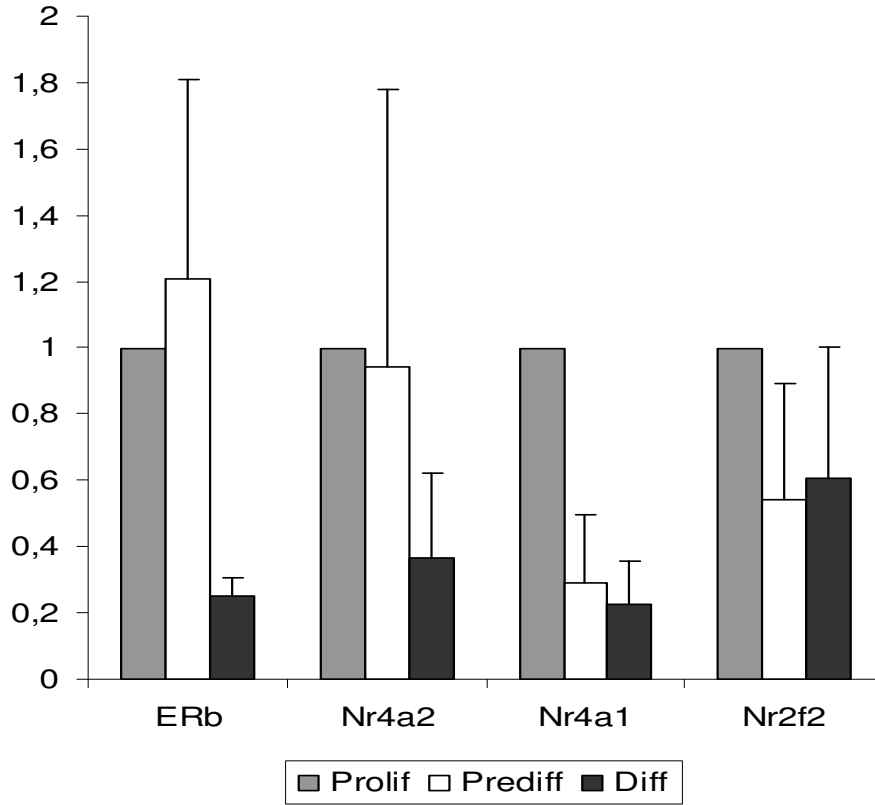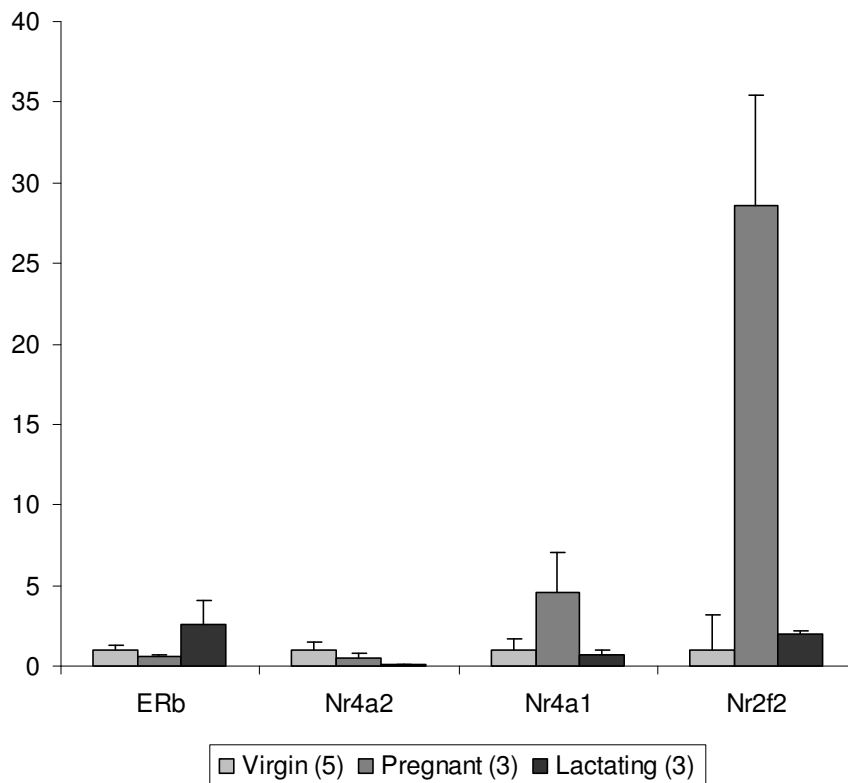

Supplement: Additional file 5 [file bcr2256-s5.pdf]
